# Supplementary material for: Highly-conductive Cu-substituted brownmillerite with emergent 3-dimensional oxygen vacancy channels
Source: Royal Society of Chemistry journal article supplement (doi:10.1039/d3tc00501a), 2023-01-01
Supplement: d3tc00501a1.pdf [file d3tc00501a1.pdf]

## Supporting information

### High-conductive Cu-substituted brownmillerite with emergent 3-dimensional oxygen vacancy channels

Wenqiao Han,<sup>‡</sup> <sup>a</sup> Songbai Hu,<sup>‡</sup> <sup>b, a</sup> Xiaowen Li,<sup>a</sup> Qi Liu,<sup>a</sup> Mao Ye,<sup>c</sup> Zedong Xu,<sup>d</sup> Sixia Hu,<sup>e</sup> Yuanmin Zhu,<sup>\*, f</sup> and Lang Chen<sup>\*, a, e</sup>

<sup>a</sup>*Department of Physics, Southern University of Science and Technology, Shenzhen 518055, China. E-mail: chenlang@sustech.edu.cn*

<sup>b</sup>*School of Physical Sciences, Great Bay University, Dongguan 523429, China*

<sup>c</sup>*School of Physics and Materials Science, Guangzhou University, Guangzhou 510006, China.*

<sup>d</sup>*School of Electronics and Information Engineering, Tiangong University, Tianjin 300387, China.*

<sup>e</sup>*Core Research Facilities, Southern University of Science and Technology, Shenzhen 518055, China.*

<sup>f</sup>*School of Materials Science and Engineering, Dongguan University of Technology, Dongguan 523808, China. E-mail: zhuyuanm@dgut.edu.cn*

<sup>‡</sup>These authors contributed equally.

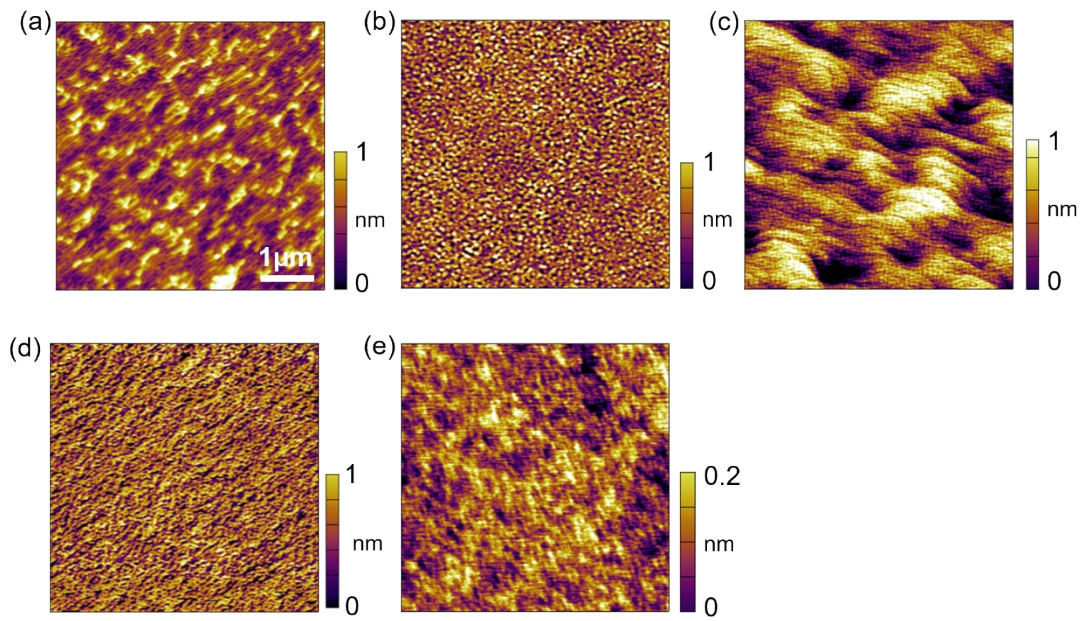

**Figure S1.** Surface topography of as-deposited (a) BM-SCO, (b) Cu10, (c) Cu20, (d) Cu33 and (e) Cu50.

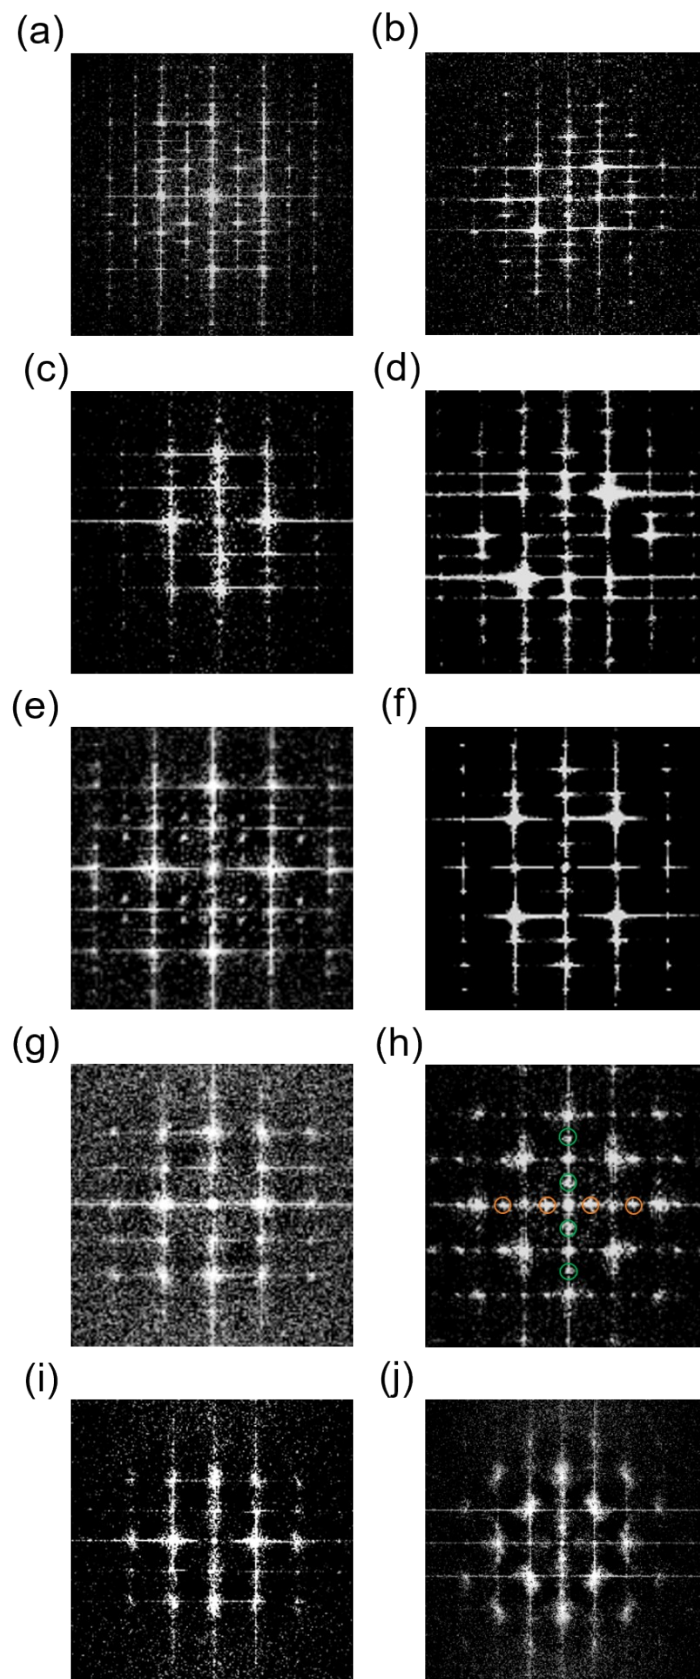

**Figure S2.** The fast Fourier transform (FFT) of the STEM images in **Figure 2a-j**.

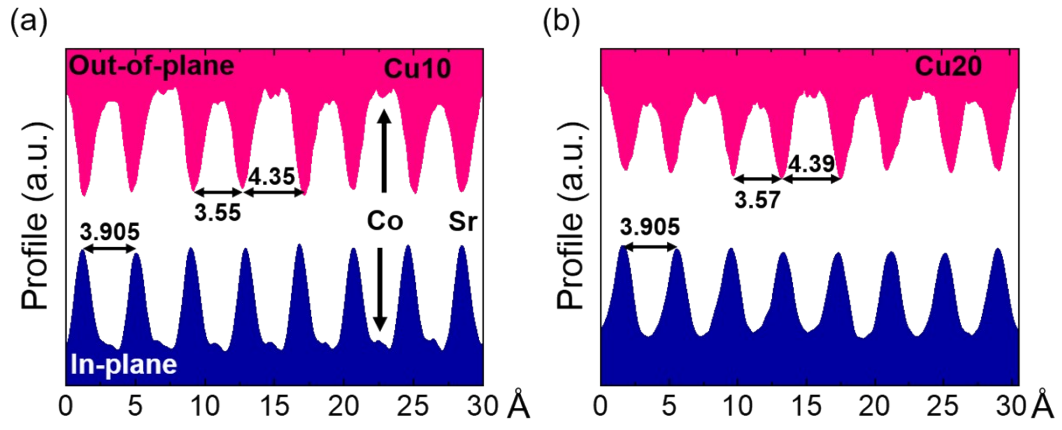

**Figure S3.** The  $d_{\text{Sr-Sr}}$  for (a) Cu10 and (b) Cu20 along in-plane and out-of-plane direction.

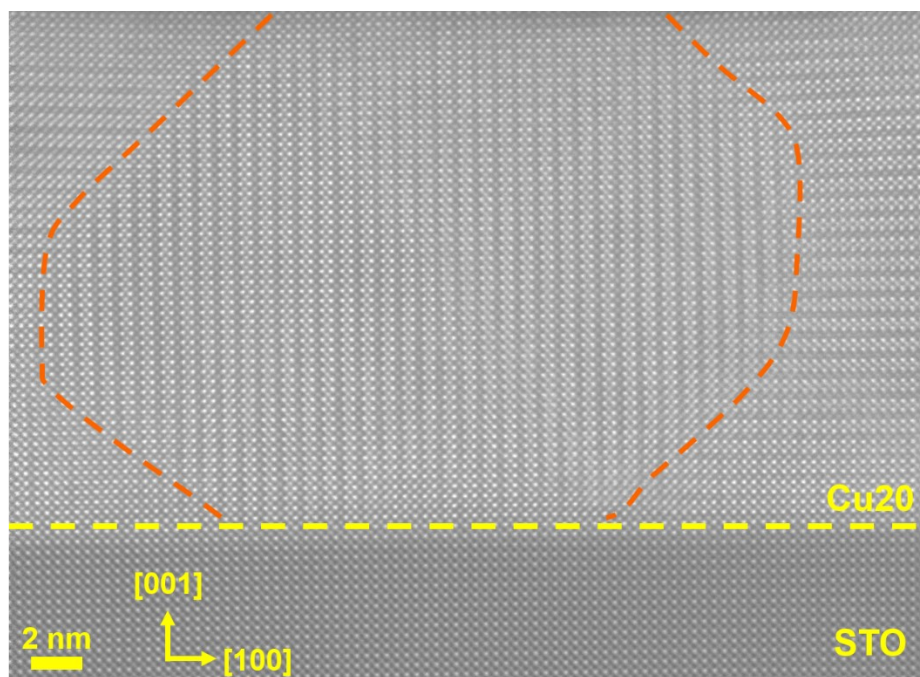

**Figure S4.** Cross-section of the Cu<sub>2</sub>O with both in-plane and out-of-plane arrangement of octahedra and tetrahedra layers.

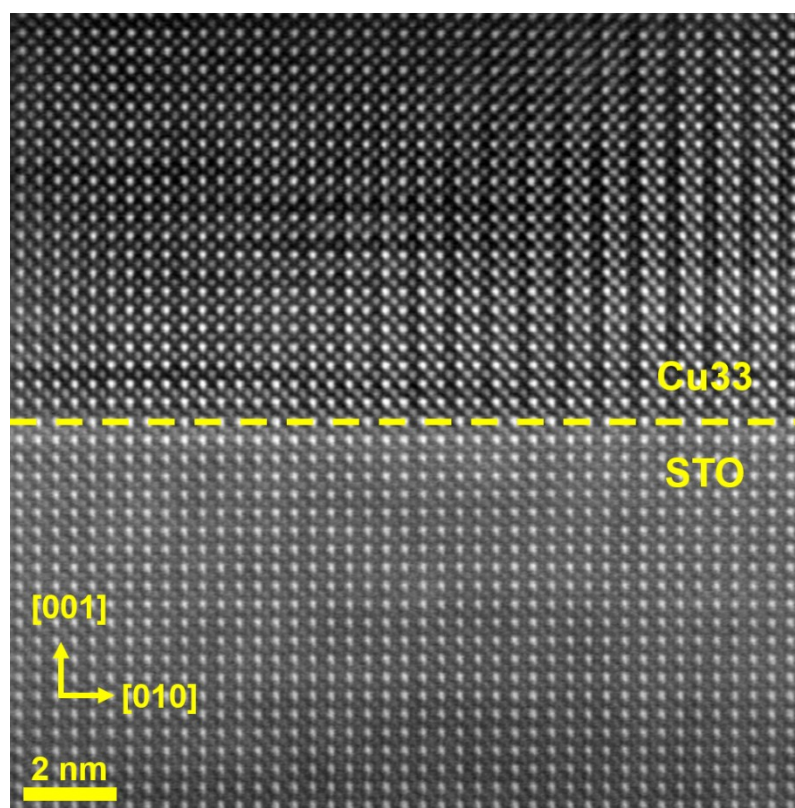

**Figure S5.** Cross-section of (010) plane of Cu33.



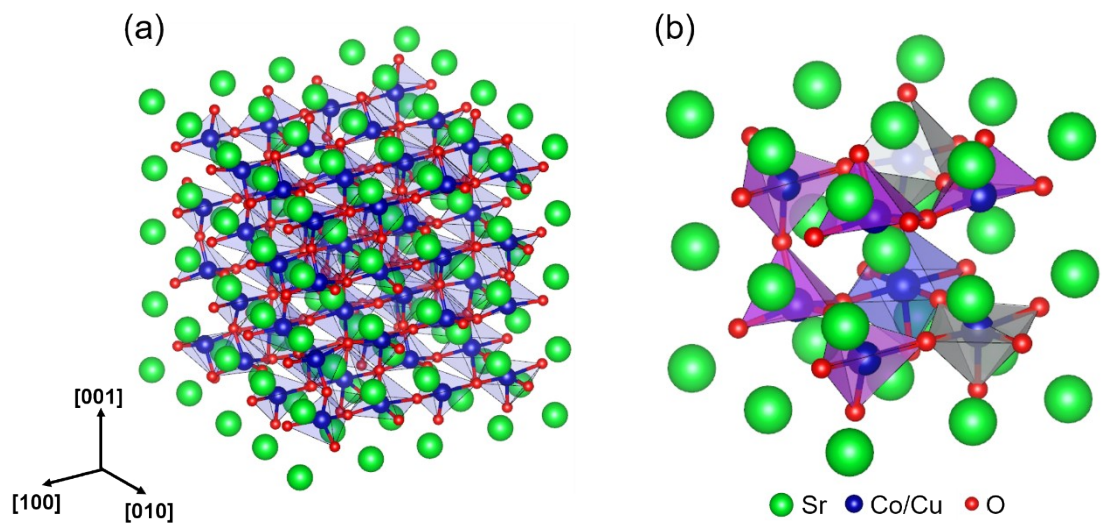

**Figure S6.** (a) Atomic structure for the novel 3D  $V_O^{\bullet\bullet}$  structure of Cu<sub>33</sub>; (b) shows the magnified view of the structure, which is one-eighth the size of that in (a).

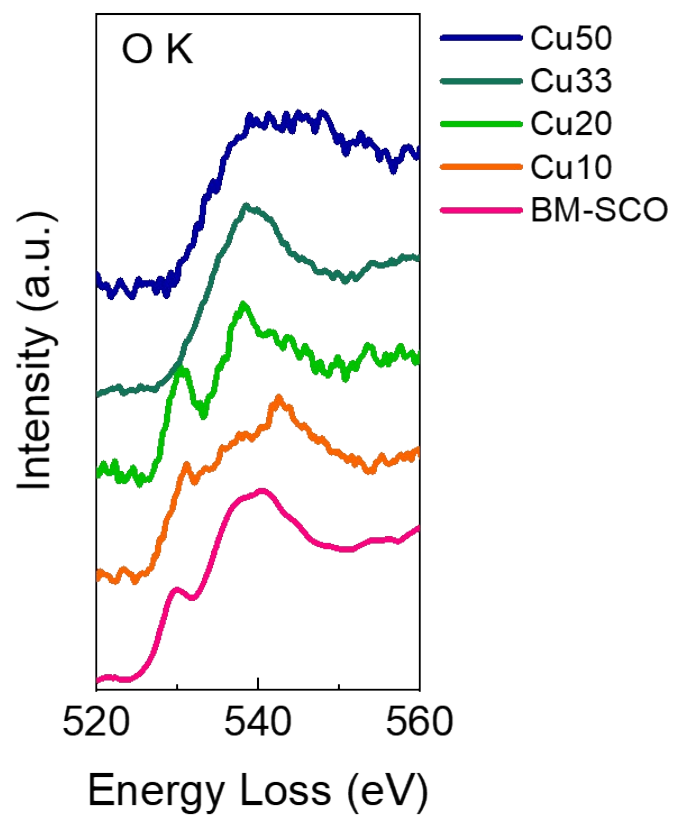

**Figure S7.** Electron energy-loss spectra (EELS) of the O *K*-edges for Cu-doped SCOs. The pink line presenting the data of BM-SCO was quoted from the work of B. Cui, et al.<sup>1</sup>



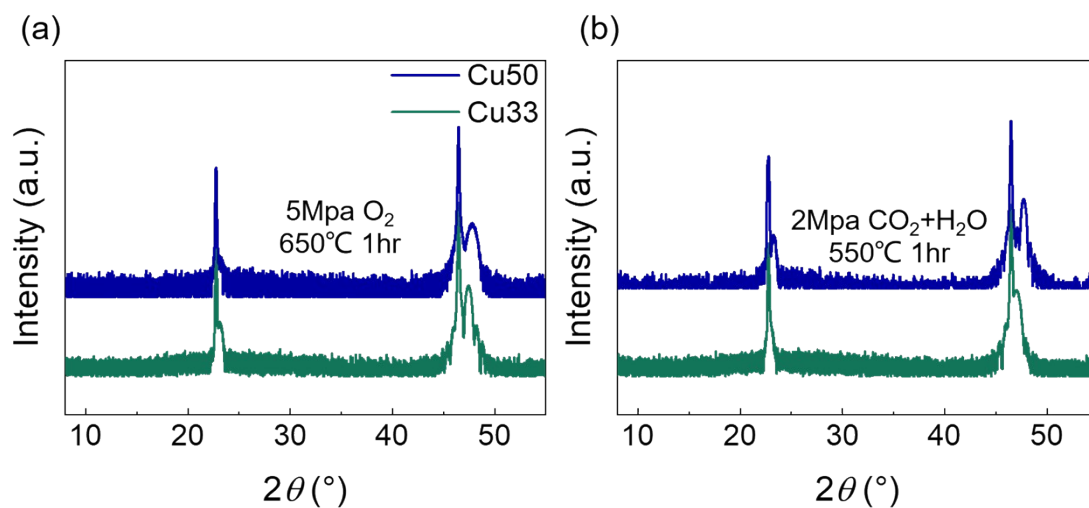

**Figure S8.**  $\theta$ - $2\theta$  scans for Cu33 and Cu50 after annealing under (a) high oxygen and (b) water vapor pressure atmosphere for 1hr.

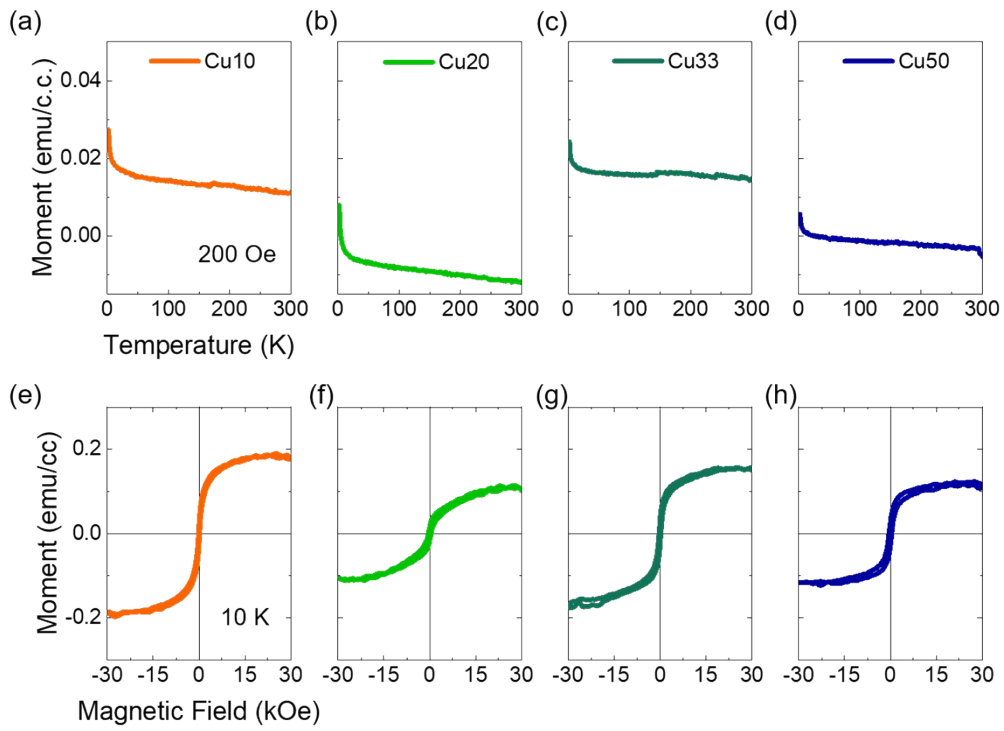

**Figure S9.**  $M-T$  curves of (a) Cu10, (b) Cu20, (c) Cu33, and (d) Cu50 with the magnetic field of 200 Oe; the corresponding  $M-H$  loops measured at 10 K are shown in (e), (f), (g), and (h), respectively.

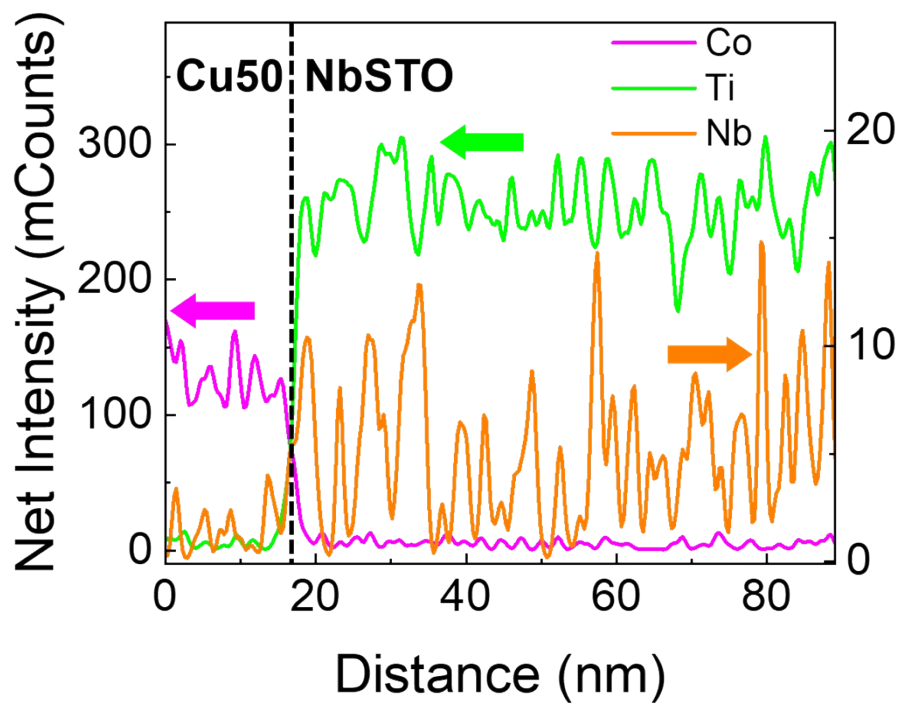

**Figure S10.** EDS intensity of Co, Ti and Nb across the film/substrate interface.

## References

1. B. Cui, P. Werner, T. Ma, X. Zhong, Z. Wang, J. M. Taylor, Y. Zhuang and S. S. P. Parkin, *Nat. Commun.*, 2018, **9**, 3055.
